# Supplementary material
Source: PubMed Central journal article supplement (PMC9745890)
Supplement: pt2c00160_si_001.pdf [file pt2c00160_si_001.pdf]

## **Supporting information**

**In vitro characterisation of 6-methyl-3-(2-nitro-1-(thiophen-2-yl)ethyl)-2-phenyl-1*H*-indole (ZCZ011) at the type 1 cannabinoid receptor: allosteric agonist or allosteric modulator?**

**Authors:** Hayley M. Green<sup>a</sup>, David B. Finlay<sup>a</sup>, Ruth A. Ross<sup>b</sup>, Iain R. Greig<sup>c</sup>, Stephen B. Duffull<sup>d</sup>, Michelle Glass<sup>a\*</sup>

**\*Corresponding author:** Professor Michelle Glass, Department of Pharmacology and Toxicology, University of Otago, PO Box 56, Dunedin, New Zealand 9054. +64 3 479 8524; [michelle.glass@otago.ac.nz](mailto:michelle.glass@otago.ac.nz)

### **Author Information:**

<sup>a</sup>Department of Pharmacology and Toxicology, School of Biomedical Sciences, University of Otago, Dunedin, New Zealand (HMG, DBF, MG);

<sup>b</sup>Department of Pharmacology and Toxicology, Faculty of Medicine, University of Toronto, Toronto, Canada (RAR);

<sup>c</sup>School of Medicine, Medical Sciences and Nutrition, University of Aberdeen, Aberdeen, UK (IRG);

<sup>d</sup>Otago Pharmacometrics Group, School of Pharmacy, University of Otago, Dunedin, New Zealand (SBD).

|                                                                                                                                                                                                                                                                                                                                                                                                                                                                                     |   |
|-------------------------------------------------------------------------------------------------------------------------------------------------------------------------------------------------------------------------------------------------------------------------------------------------------------------------------------------------------------------------------------------------------------------------------------------------------------------------------------|---|
| <b>Figure S1: Allosteric agonism by ZCZ011 in HEK293 cells.</b> (A) inhibition of cAMP stimulated by 5 $\mu$ M forskolin and a concentration series of ZCZ011, (B) dissociation of $G_{\alpha i3}$ and $G_{\beta\gamma}$ subunits as determined by TRUPATH BRET assay stimulated by ZCZ011, and (C) translocation of $\beta$ -arrestin-2 by ZCZ011. Data is a representative biological replicate (n=5) and is expressed as mean $\pm$ SD of technical duplicates/triplicates. .... | 3 |
| <b>Figure S2: cAMP inhibition of orthosteric agonists alone and in combination with ZCZ011 in HEK293-hCB<sub>1</sub> cells.</b> Real time kinetic traces showing inhibition of cAMP stimulated by 5 $\mu$ M forskolin and AMB-FUBINACA (A) or THC (B) in the absence of ZCZ011, and THC in the presence of 1 $\mu$ M (C), 100 nM (D), or 10 nM (E) ZCZ011. Data is a representative biological replicate (n=5) and is expressed as mean $\pm$ SD of technical duplicates. ....      | 4 |
| <b>Figure S3: G protein dissociation of orthosteric agonists alone and in combination with ZCZ011 in HEK293-hCB<sub>1</sub> cells.</b> Dissociation of $G_{\alpha i3}$ and $G_{\beta\gamma}$ subunits as determined by TRUPATH BRET assay stimulated with THC, CP55940, and AMB-FUBINACA alone (A, C, E) and in the presence of 1 $\mu$ M ZCZ011 (B, D, F). Data is a representative biological replicate (n=5) and is expressed as mean $\pm$ SD of technical triplicates. ....    | 5 |
| <b>Figure S4: <math>\beta</math>-arrestin 1 translocation of orthosteric agonists alone and in combination with ZCZ011 in HEK293 cells.</b> Real-time kinetic traces showing translocation of $\beta$ -arrestin 1 stimulated by THC, CP55940, and AMB-FUBINACA alone (A, D, G) and in combination with 10 $\mu$ M (B, E, H) or 1 $\mu$ M ZCZ011 (C, F, I). Data is a representative biological replicate (n=5) and is expressed as mean $\pm$ SD of technical triplicates. ....     | 6 |
| <b>Figure S5: <math>\beta</math>-arrestin 2 translocation of orthosteric agonists alone and in combination with ZCZ011 in HEK293 cells.</b> Real-time kinetic traces showing translocation of $\beta$ -arrestin 2 stimulated by THC, CP55940, and AMB-FUBINACA alone (A, D, G) and in combination with 10 $\mu$ M (B, E, H) or 1 $\mu$ M ZCZ011 (C, F, I). Data is a representative biological replicate (n=5) and is expressed as mean $\pm$ SD of technical triplicates. ....     | 7 |

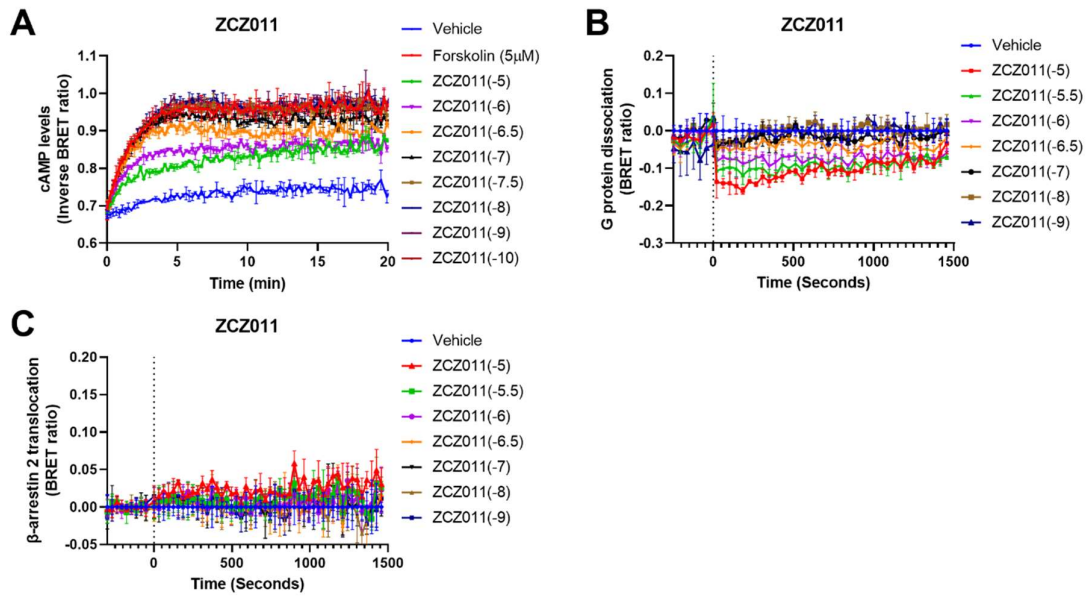

**Figure S1: Allosteric agonism by ZCZ011 in HEK293 cells.** (A) inhibition of cAMP stimulated by 5  $\mu$ M forskolin and a concentration series of ZCZ011, (B) dissociation of  $G_{\alpha i3}$  and  $G_{\beta\gamma}$  subunits as determined by TRUPATH BRET assay stimulated by ZCZ011, and (C) translocation of  $\beta$ -arrestin-2 by ZCZ011. Data is a representative biological replicate ( $n=5$ ) and is expressed as mean  $\pm$  SD of technical duplicates/triplicates.

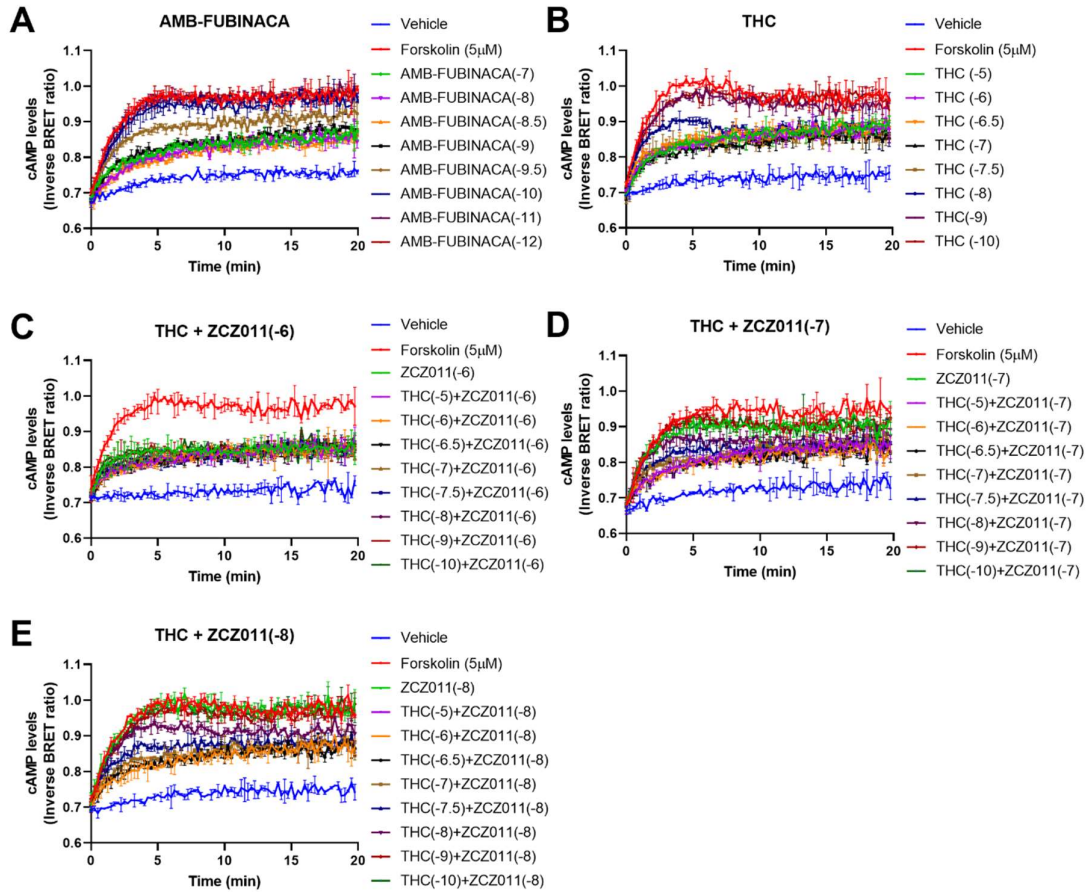

**Figure S2:** *cAMP inhibition of orthosteric agonists alone and in combination with ZCZ011 in HEK293-hCB<sub>1</sub> cells. Real time kinetic traces showing inhibition of cAMP stimulated by 5 µM forskolin and AMB-FUBINACA (A) or THC (B) in the absence of ZCZ011, and THC in the presence of 1 µM (C), 100 nM (D), or 10 nM (E) ZCZ011. Data is a representative biological replicate (n=5) and is expressed as mean ± SD of technical duplicates.*

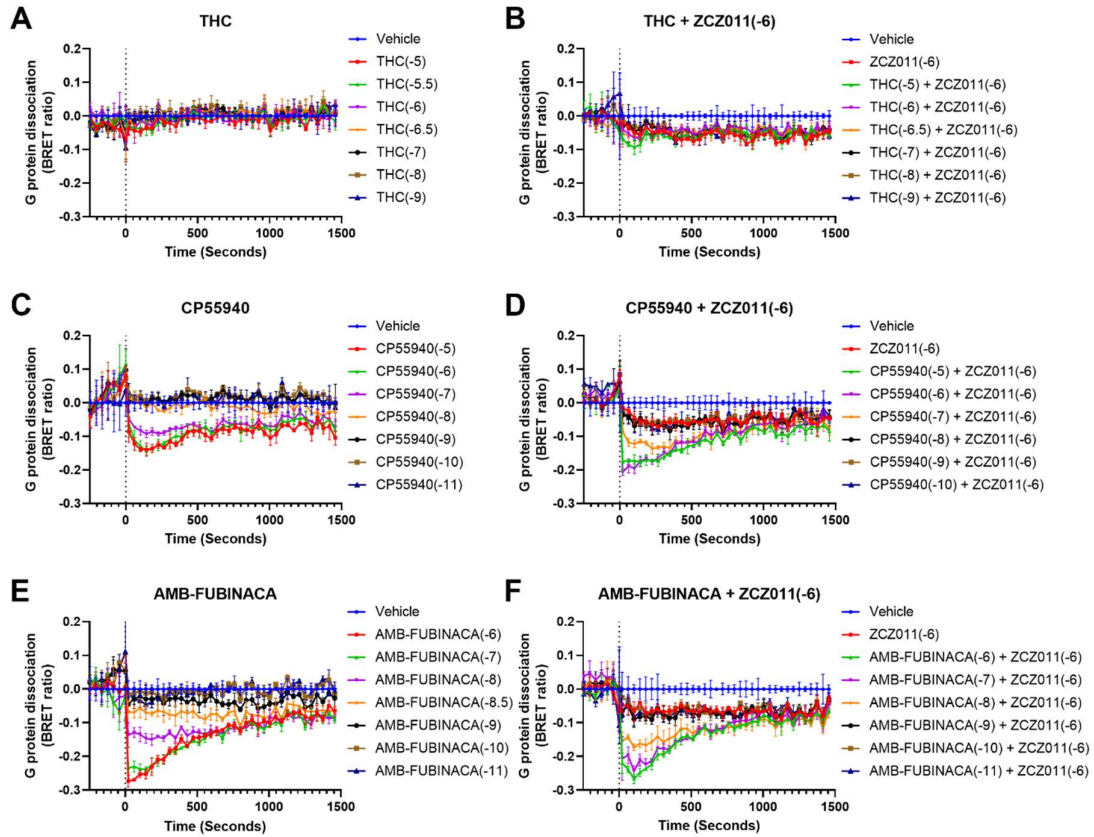

**Figure S3: G protein dissociation of orthosteric agonists alone and in combination with ZCZ011 in HEK293-hCB<sub>1</sub> cells.** Dissociation of G<sub>αi3</sub> and G<sub>βγ</sub> subunits as determined by TRUPATH BRET assay stimulated with THC, CP55940, and AMB-FUBINACA alone (A, C, E) and in the presence of 1 μM ZCZ011 (B, D, F). Data is a representative biological replicate (n=5) and is expressed as mean ± SD of technical triplicates.

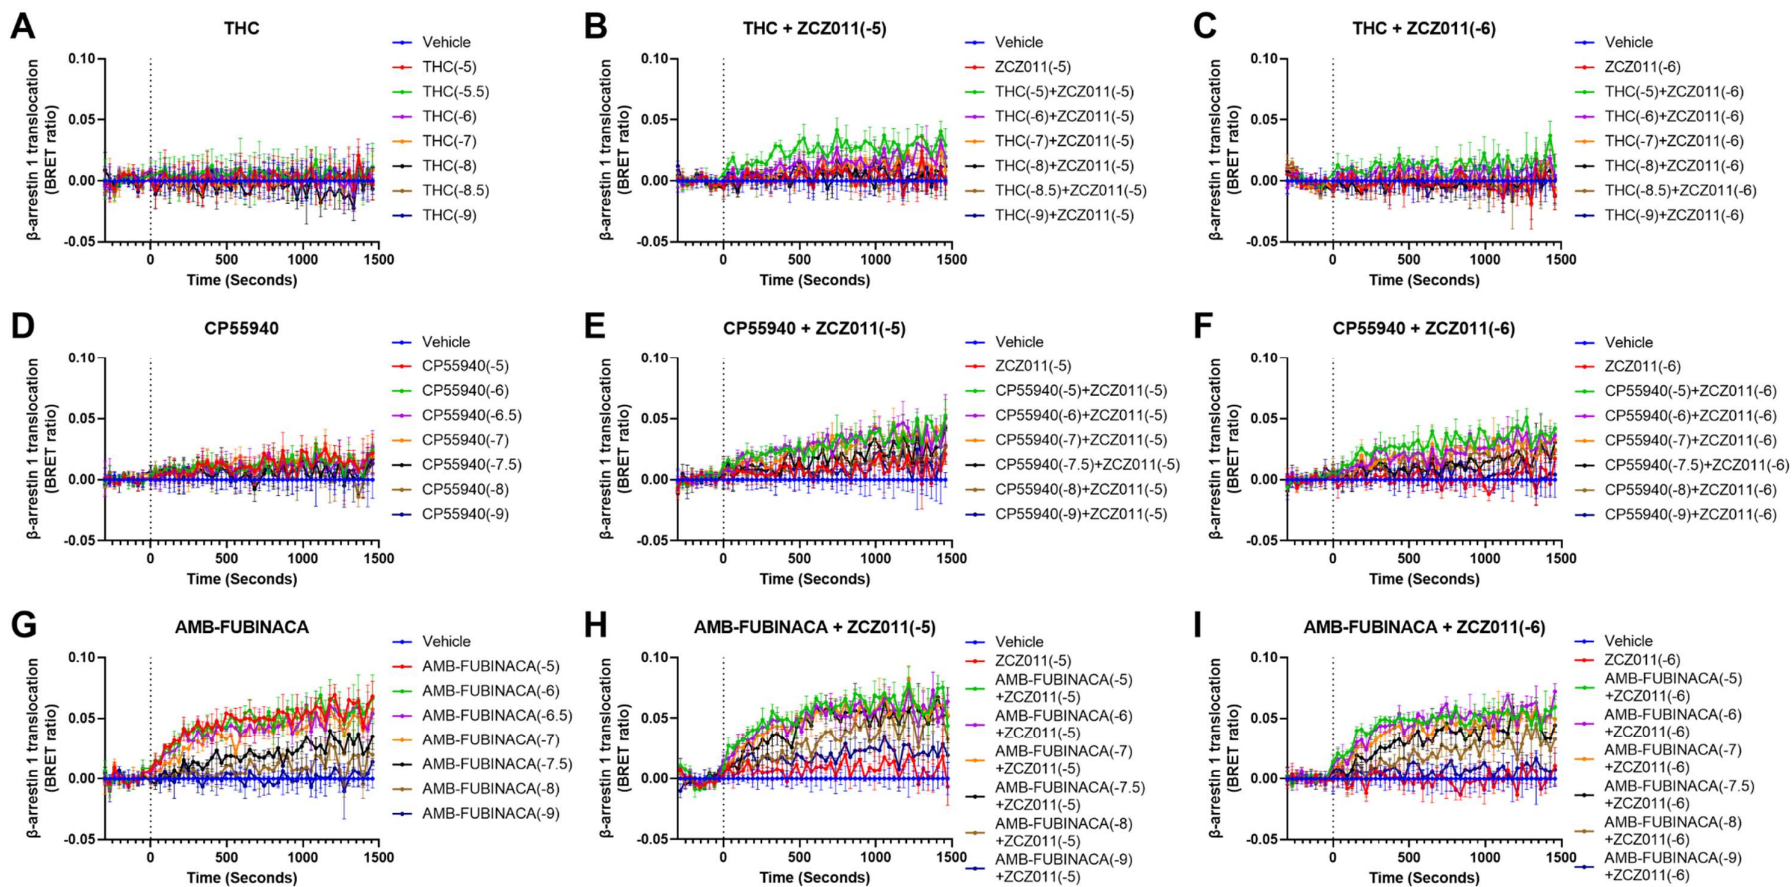

**Figure S4:**  $\beta$ -arrestin 1 translocation of orthosteric agonists alone and in combination with ZCZ011 in HEK293 cells. Real-time kinetic traces showing translocation of  $\beta$ -arrestin 1 stimulated by THC, CP55940, and AMB-FUBINACA alone (A, D, G) and in combination with 10  $\mu$ M (B, E, H) or 1  $\mu$ M ZCZ011 (C, F, I). Data is a representative biological replicate ( $n=5$ ) and is expressed as mean  $\pm$  SD of technical triplicates.



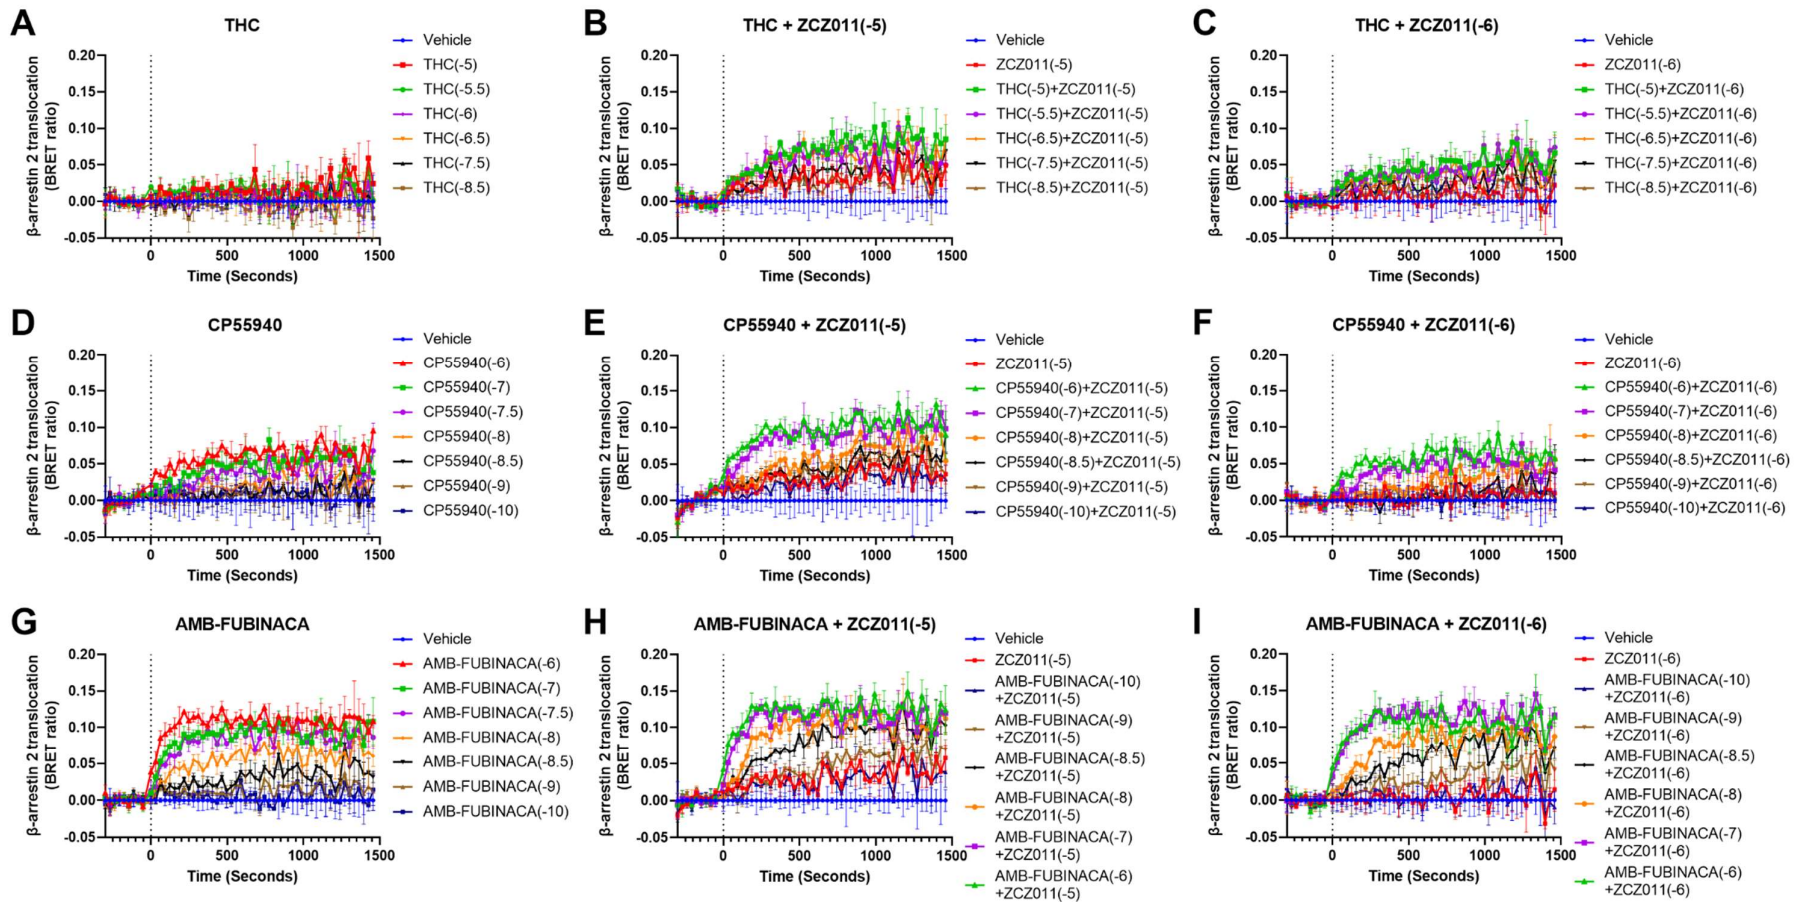

**Figure S5:  $\beta$ -arrestin 2 translocation of orthosteric agonists alone and in combination with ZCZ011 in HEK293 cells.** Real-time kinetic traces showing translocation of  $\beta$ -arrestin 2 stimulated by THC, CP55940, and AMB-FUBINACA alone (A, D, G) and in combination with 10  $\mu$ M (B, E, H) or 1  $\mu$ M ZCZ011 (C, F, I). Data is a representative biological replicate ( $n=5$ ) and is expressed as mean  $\pm$  SD of technical triplicates.
